# Supplementary material for: Mol-Zero-GAN: zero-shot adaptation of molecular generative adversarial network for specific protein targets
Source: Royal Society of Chemistry journal article supplement (doi:10.1039/d3ra03954d), 2023-01-01
Supplement: d3ra03954d1.pdf [file d3ra03954d1.pdf]

## Supporting Information

### Mol-Zero-GAN: Zero-Shot Adaptation of Molecular Generative Adversarial Network for Specific Protein Targets

Ravipas Aphikulvanich<sup>\*1</sup>, Natapol Pornputtapong<sup>†2</sup>, and Duangdao  
Wichadakul<sup>‡1,3</sup>

<sup>1</sup>Department of Computer Engineering, Faculty of Engineering, Chulalongkorn University,  
Bangkok, 10330, Thailand

<sup>2</sup>Department of Biochemistry and Microbiology, Faculty of Pharmaceutical Sciences,  
Chulalongkorn University, Bangkok, 10330, Thailand

<sup>3</sup>Center of Excellence in Systems Biology, Faculty of Medicine, Chulalongkorn University,  
Bangkok, 10330, Thailand

---

<sup>\*</sup>Email: ravipas.apk@gmail.com

<sup>†</sup>Email: natapol.p@chula.ac.th

<sup>‡</sup>Email: duangdao.w@chula.ac.th

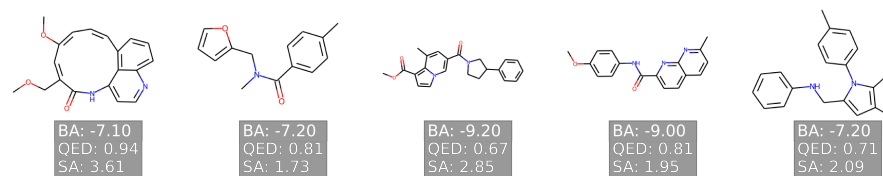

Figure S1: Example of generated molecules from the BA optimization model of *DRD3* protein.

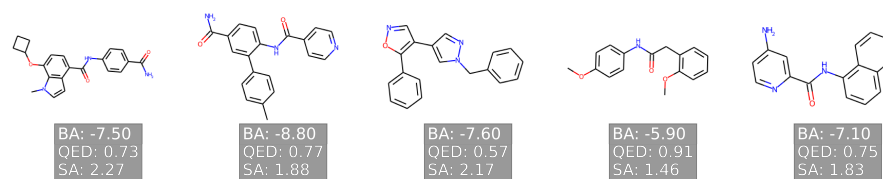

Figure S2: Example of generated molecules from the BA optimization model of *SARS – CoV – 2 M<sub>pro</sub>* protein.

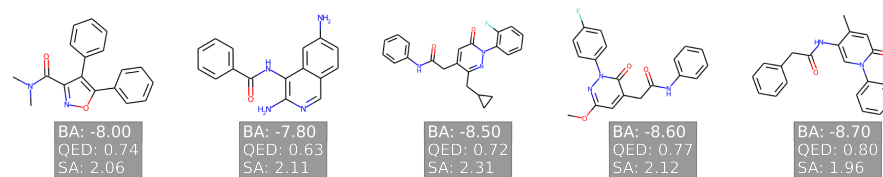

Figure S3: Example of generated molecules from the BA optimization model of *TTBK1* protein.

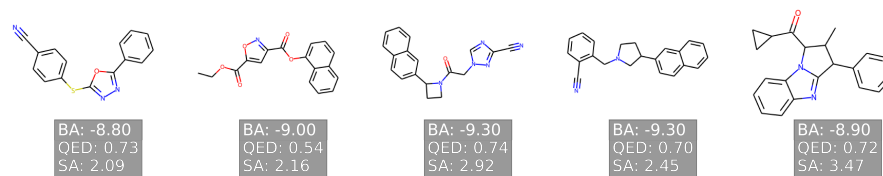

Figure S4: Example of generated molecules from the BA optimization model of *EGFR* protein.

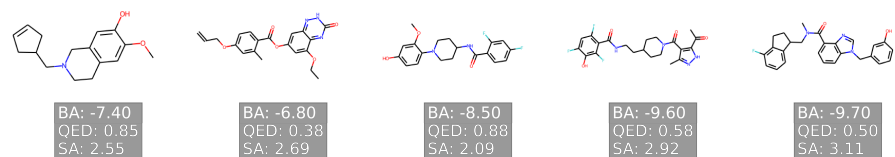

Figure S5: Example of generated molecules from the BA optimization model of *HTR1A* protein.

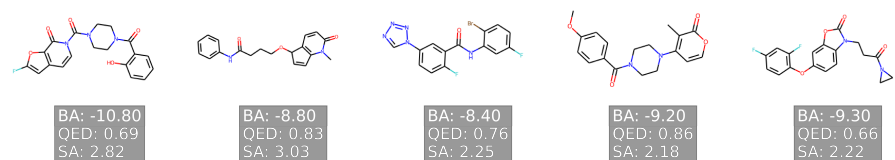

Figure S6: Example of generated molecules from the BA optimization model of *S1PR1* protein.

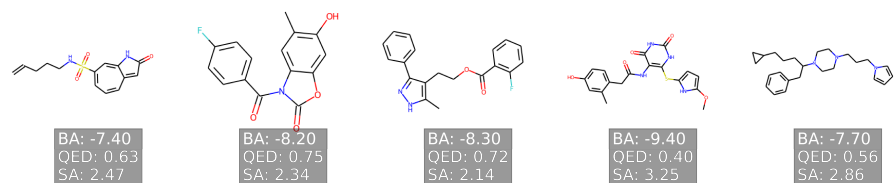

Figure S7: Example of generated molecules from the BA optimization model of *AKT1* protein.

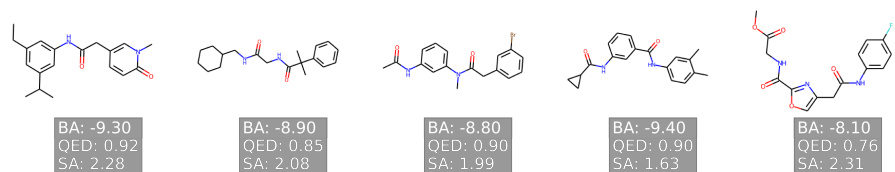

Figure S8: Example of generated molecules from the weighted sum optimization model of *DRD3* protein.

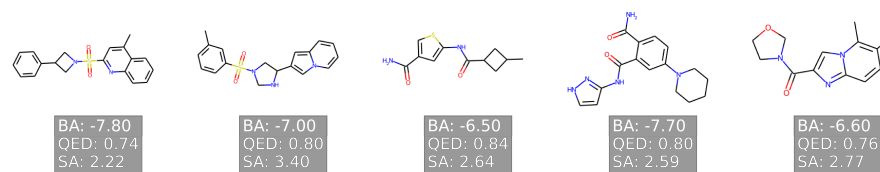

Figure S9: Example of generated molecules from the weighted sum optimization model of *SARS – CoV – 2 M<sub>pro</sub>* protein.

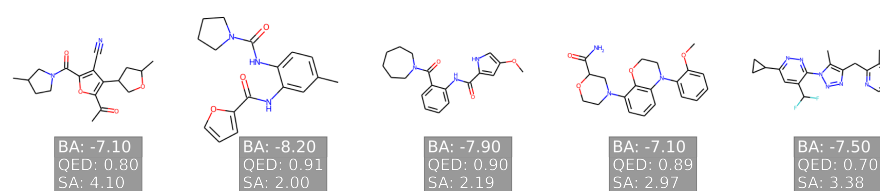

Figure S10: Example of generated molecules from the weighted sum optimization model of *TTBK1* protein.

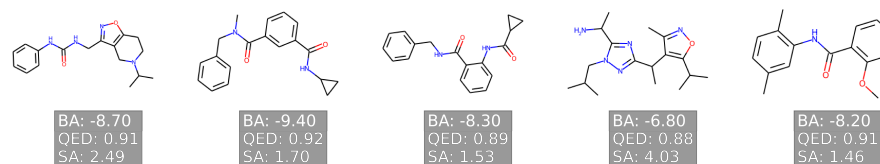

Figure S11: Example of generated molecules from the weighted sum optimization model of *EGFR* protein.



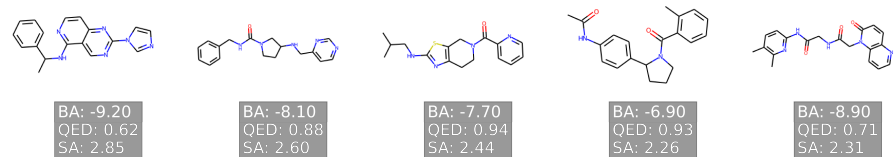

Figure S12: Example of generated molecules from the weighted sum optimization model of *HTR1A* protein.

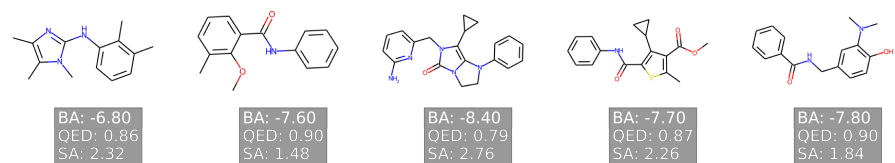

Figure S13: Example of generated molecules from the weighted sum optimization model of *S1PR1* protein.

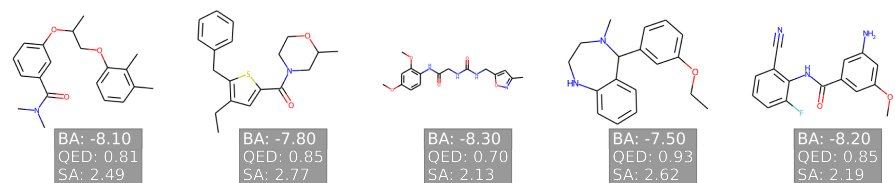

Figure S14: Example of generated molecules from the weighted sum optimization model of *AKT1* protein.
